## PROPHYLACTIC CLIPPING TO PREVENT DELAYED COLONIC POST-POLYPECTOMY BLEEDING: META-ANALYSIS OF RANDOMIZED AND OBSERVATIONAL STUDIES

K. Bishay<sup>2</sup>, Z. Meng<sup>2</sup>, L. Frehlich<sup>2</sup>, M.T. James<sup>2</sup>, G.G. Kaplan<sup>2</sup>, M.J. Bourke<sup>1</sup>, R.J. Hilsden<sup>2</sup>, S. Heitman<sup>3</sup>, N. Forbes<sup>4</sup>

1. University of Sydney, Westmead, New South Wales, Australia; 2. University of Calgary, Calgary, AB, Canada; 3. University of Calgary, Calgary, AB, Canada; 4. University of Calgary, Calgary, AB, Canada

**Background:** Delayed post-polypectomy bleeding (DPPB) is a commonly described adverse event following polypectomy. Prophylactic clipping may prevent DPPB in some patient subgroups. We performed a meta-analysis to assess both the efficacy and real-world effectiveness of prophylactic clipping.

**Aims:** We performed a meta-analysis to assess both the efficacy and real-world effectiveness of prophylactic clipping.

**Methods:** We performed a database search through March 2020 for clinical trials or observational studies assessing prophylactic clipping and DPPB. Pooled risk ratios (RR) were calculated using random effects models. Subgroup, sensitivity and meta-regression analyses were performed to elucidate clinical or methodological factors associated with effects on outcomes.

**Results:** A total of 2,771 citations were screened, with 11 randomized controlled trials (RCTs) and 9 observational studies included, representing 24,670 colonoscopies. DPPB occurred in 2.0% of patients overall. The pooled RR of DPPB was 0.47 (95% CI 0.29 – 0.77) from RCTs enrolling only patients with polyps  $\geq$  20 mm. Remaining pooled RCT data did not demonstrate a benefit for clipping. The pooled RR of DPPB was 0.96 (95% CI 0.61 – 1.51) from observational studies including all polyp sizes. For patients with proximal polyps of any size, the RR was 0.73 (95% CI 0.33 - 1.62) from RCTs. Meta-regression confirmed that polyp size  $\geq$  20 mm significantly influenced the effect of clipping on DPPB.

**Conclusions:** Pooled evidence demonstrates a benefit when clipping polyps measuring  $\geq$  20 mm, especially in the proximal colon. In lower-risk subgroups, prophylactic clipping should not be performed.

**Funding Agencies:** None
